# Supplementary material
Source: publisher figshare collection journal article supplement (https://future-science-group.figshare.com/ndownloader/files/34397081)
Supplement: Supplementary file 1 [file 34397081]

**Table S2.** Detection of human DNA in organs (average Ct ± standard deviation) of rats that received a local injection of periodontal ligament stem cells (PDLSCs) with high (HP-PDLS) and low (LP-PDLSCs) osteogenic potential and of phosphate buffered saline (PBS) in calvarial defects, 4 weeks post-injection

| **Treatment** | **Target gene** | **Brain** | **Heart** | **Lungs** | **Liver** | **Kidney** | **Spleen** |
| --- | --- | --- | --- | --- | --- | --- | --- |
| **HP-PDLSCs** | *Alu* | 33.9±.04 | 35.1±0.4 | 35.2±0.4 | 34.4±0.4 | 35.9±0.1 | 35.9±0.5 |
| *Gapdh* | 20.5±0.0 | 24.6±0.0 | 20.6±0.0 | 20.9±0.0 | 20.2±0.0 | 19.9±0.1 |
| **LP-PDLSCs** | *Alu* | 34.1±0.5 | 34.5±0.4 | 35.7±1.1 | 37.5±2.0 | 36.9±0.4 | 35.3±0.5 |
| *Gapdh* | 20.6±0.7 | 19.7±0.1 | 20.5±0.2 | 23.5±0.2 | 19.9±0.3 | 19.4±0.3 |
| **PBS** | *Alu* | 34.5±0.2 | 35.4±0.5 | 35.3±0.8 | 35.1±0.6 | 35.8±1.7 | 35.7±2.1 |
| *Gapdh* | 21.2±0.2 | 19.9±0.3 | 22.5±0.0 | 24.9±0.1 | 20.7±0.5 | 20.3±0.1 |

The average Ct value for the *Alu* sequence in human PDLSCs was 16.0±0.1.
